# Supplementary material
Source: publisher figshare collection journal article supplement (https://frontiersin.figshare.com/ndownloader/files/16379096)
Supplement: Supplementary file [file 16379096]

## *Supplementary Material*

### **MATERIALS AND METHODS**

#### **Cell Apoptosis Assay**

APPswe cells were transfected with BACE1 siRNA or PRKACB siRNA and accompanied transfected with miR-200a-3p mimics or their negative controls. The apoptosis was determined with FITC-Annexin V / propidium iodide (PI) Apoptosis Detection Kit (BD Biosciences; San Jose, CA). After 48 h, the cells were trypsinized and washed by PBS. Then, the cells were collected and resuspended in binding buffer and subsequently mixed with 5  $\mu$ L Annexin V and 10  $\mu$ L PI for 15 min in the dark. The ratio of apoptosis was analyzed by a FACSCalibur flow cytometry (BD Biosciences).

#### **Statistical Analysis**

Data are represented as the mean  $\pm$  SEM.  $P < 0.05$  was considered statistically significant. Comparisons were performed using one-way ANOVA, followed by appropriate post-hoc testing to analyze the differences between groups.

### **RESULTS**

#### **The Neuroprotective Effects of miR-200a-3p were in a Decreased Tendency When BACE1 and PRKACB were Knockdown**

When we transfected BACE1 siRNA accompanied with miR-200a-3p mimics in APPswe cells, the effects of miR-200a-3p on reducing apoptotic ratios were shown in a decreased tendency. The same results were found in APPswe cells co-transfected with PRKACB siRNA and miR-200a-3p. Due to no significance was calculated, we speculated that the neuroprotective effects of miR-200a-3p on cell apoptosis might be associated with the regulation of BACE1 and PRKACB (**Supplementary Fig. 1**).

### **SUPPLEMENTARY FIGURES**

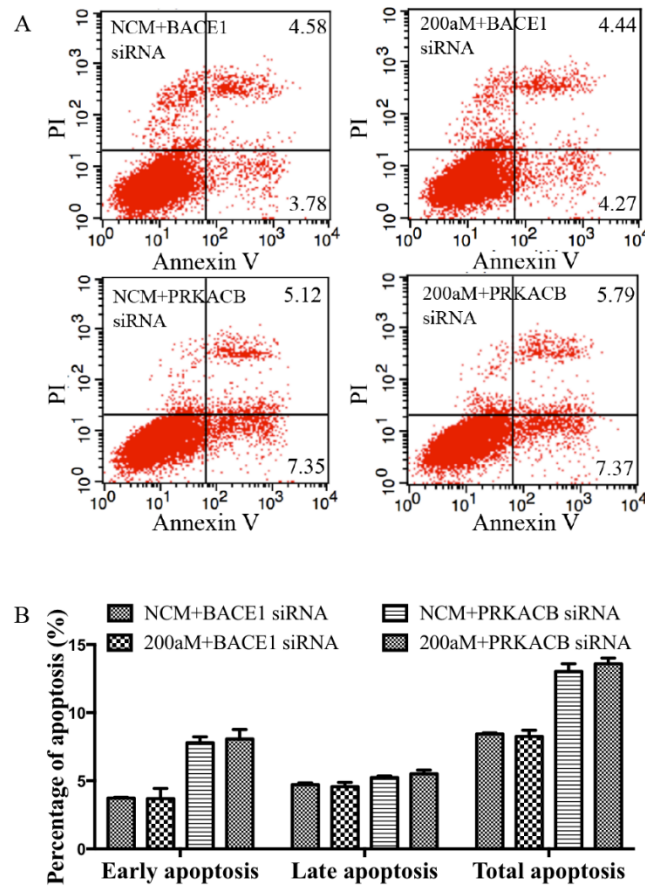

**Supplementary Figure 1.** miR-200a-3p neuroprotection was in a decreased tendency when BACE1 and PRKACB were knockdown. Effects of miR-200a-3p mimics (200aM), BACE1 siRNA, and PRKACB siRNA on apoptosis of APPswe cells detected using flow cytometry assay (A) and demonstrated by quantitative analysis (B).  $n=3$ . Data are shown as the mean  $\pm$  SEM.
